# Supplementary material
Source: Royal Society of Chemistry journal article supplement (doi:10.1039/d6tc00305b)
Supplement: d6tc00305b1.pdf [file d6tc00305b1.pdf]

## Supporting Information

### Nanocavity-Confined Cu<sub>2</sub>O in Porphyrin-based MOF for Steering CO<sub>2</sub> Electroreduction toward Hydrocarbons

*Peng Liu<sup>a</sup>, Xinqi Pan<sup>a</sup>, Shanshan Zheng<sup>a</sup>, Li Deng<sup>a</sup>, Kejing Shen<sup>a</sup>, Shilei Ding<sup>b</sup>, Ruoyu Chen<sup>c</sup>,  
Zhifeng Xin<sup>\*a</sup>*

<sup>a</sup> Institute of Molecular Engineering and Applied Chemistry, Anhui University of Technology, Ma'anshan, Anhui 243002, P. R. China.

<sup>b</sup> School of Energy and Environment, Anhui University of Technology, Ma'anshan 243002, China.

<sup>c</sup> School of Metallurgical Engineering, Anhui University of Technology, Maanshan, Anhui 243002, China<sup>1</sup> The two authors are equally contributed.

\* Correspondence and requests for materials should be addressed to Z. X. (email: [xinzf521@ahut.edu.cn](mailto:xinzf521@ahut.edu.cn)).

**Materials:** 4-Formylbenzoic acid, N,N-dimethylformamide (DMF), copper(II) sulfate pentahydrate ( $\text{CuSO}_4 \cdot 5\text{H}_2\text{O}$ ), ascorbic acid, zirconyl chloride octahydrate ( $\text{ZrOCl}_2 \cdot 8\text{H}_2\text{O}$ ), dichloroacetic acid, sodium hydroxide (NaOH), pyrrole, absolute ethanol ( $\text{C}_2\text{H}_5\text{OH}$ ), acetone, and anhydrous methanol ( $\text{CH}_3\text{OH}$ ) were purchased from Sinopharm Chemical Reagent Co., Ltd. High-purity gases ( $\text{CO}_2$  and  $\text{N}_2$ , purity  $\geq 99.99\%$ ) were supplied by Nanjing Special Gas Co., Ltd., and  $^{13}\text{C}$ -labeled carbon dioxide ( $^{13}\text{CO}_2$ , isotopic purity 99%) was obtained from Cambridge Isotope Laboratories (USA). Ultrapure water (resistivity  $18.25 \text{ M}\Omega \cdot \text{cm}$ ) was prepared using a Fulham Ultra-Pure Water System (Qingdao, China). All chemicals and reagents were used as received without further purification.

**Product Analysis:** Gaseous reduction products were analyzed using a Shimadzu GC-2010 gas chromatograph equipped with a flame ionization detector (FID) and a thermal conductivity detector (TCD), using  $\text{N}_2$  as the carrier gas. Liquid-phase products were quantified by  $^1\text{H}$  nuclear magnetic resonance (NMR) spectroscopy (Bruker Avance II 400 MHz). For analysis, 0.4 mL of the electrolyte was mixed with 0.1 mL deuterated dimethyl sulfoxide ( $\text{DMSO-d}_6$ , 99.99%).

### Faradaic Efficiency (FE) Calculation

The Faradaic efficiency was calculated as follows<sup>1</sup>:

$$FE = \frac{(N \times n \times F)}{Q} \times 100\%$$

where:

Q = total charge passed (Coulombs, C), F = Faraday constant ( $96485 \text{ C mol}^{-1}$ ),

N = moles of product generated, n = number of electrons required for product formation (e.g.,  $\text{H}_2$ : 2;  $\text{CO}$ : 2;  $\text{CH}_4$ : 8;  $\text{C}_2\text{H}_4$ : 12).

**Theoretical calculation:** All first-principles Density Functional Theory (DFT) calculations were performed to investigate the geometric and electronic structures of key reaction

intermediates (e.g., \*CO<sub>2</sub>, \*COOH, \*CO, \*CHO, \*OCH<sub>3</sub>, \*OHCCHO) and to evaluate the thermodynamic feasibility of the proposed pathways. The simulations were carried out using the Vienna Ab Initio Simulation Package (VASP) with the generalized gradient approximation (GGA-PBE) exchange-correlation functional<sup>2,3</sup>, incorporating Grimme's DFT-D3 dispersion correction to account for van der Waals interactions. The projector-augmented wave (PAW) method was employed to describe core electrons<sup>4</sup>, while a plane-wave basis set with a kinetic energy cutoff of 400 eV was adopted for valence electrons. The calculations were performed with a kinetic energy cutoff of 450 eV and the Perdew-Burke-Ernzerhof (PBE) functional<sup>5</sup> for exchange-correlation interactions. Gibbs free energy changes ( $\Delta G$ ) for each elementary step were computed as:

$$\Delta G = \Delta E_{\text{DFT}} + \Delta E_{\text{ZPE}} - T\Delta S + \Delta G_{\text{solv}} + \Delta G_{\text{pH}}$$

Where  $\Delta E_{\text{DFT}}$  denotes the DFT total energy difference,  $\Delta E_{\text{ZPE}}$  the zero-point energy correction (derived from vibrational frequency analysis),  $T\Delta S$  the entropic contribution,  $\Delta G_{\text{solv}}$  the solvation energy (implicit solvent model), and  $\Delta G_{\text{pH}}$  the pH-dependent term adjusted via the Nernst equation. Transition states were located using the climbing-image nudged elastic band (CI-NEB) method, with convergence criteria of  $10^{-4}$  eV for electronic self-consistency and 0.04 eV  $\text{\AA}^{-1}$  for ionic relaxation. DFT calculations were conducted using the Vienna Ab initio Simulation Package (VASP), employing plane-wave basis sets with the projector augmented-wave (PAW) pseudopotential method.

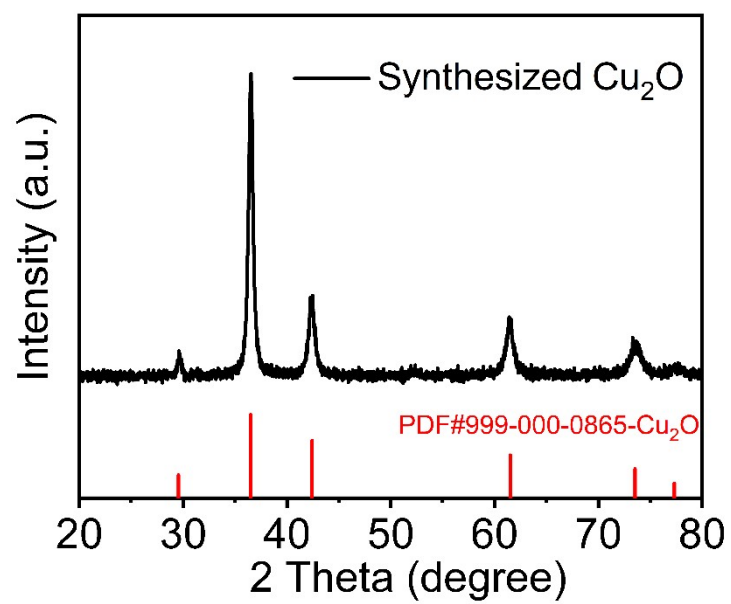

**Fig. S1.** PXRD pattern of the synthesized Cu<sub>2</sub>O nanoparticles.

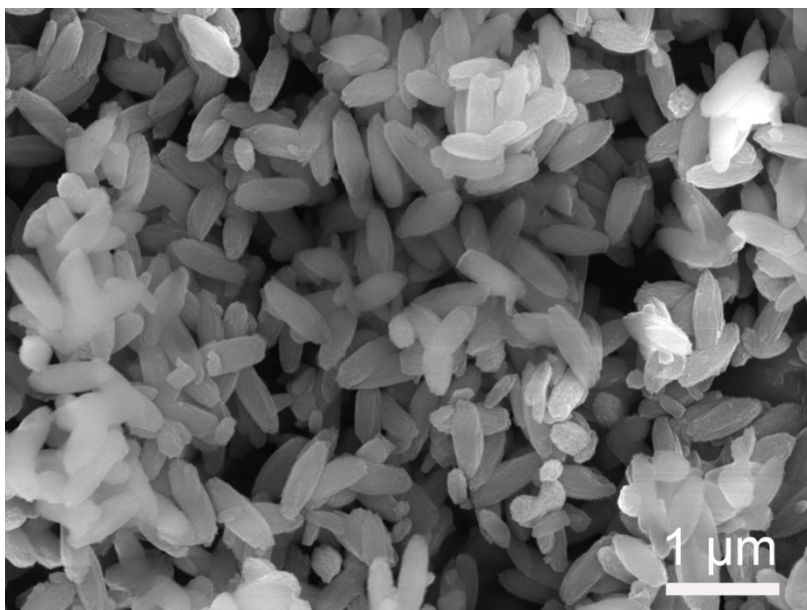

**Fig. S2.** SEM image of synthesized PCN-223.

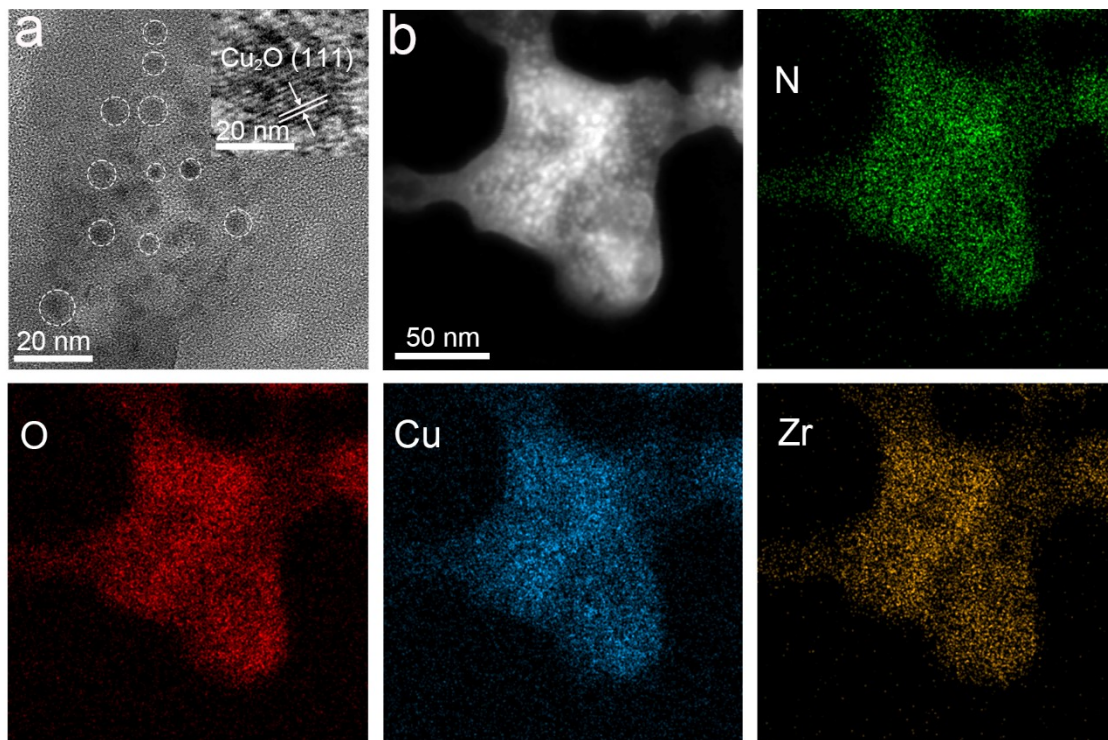

**Fig. S3.** Morphological characterization of ground Cu<sub>2</sub>O@PCN-223. (a) HRTEM image, (b) STEM image and corresponding EDX elemental mapping.

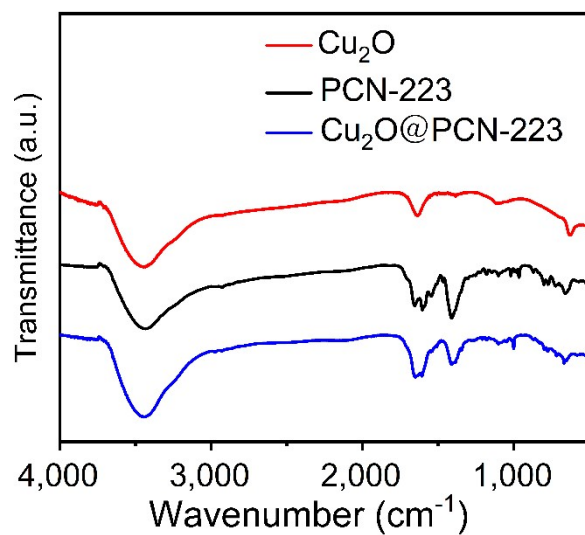

**Fig. S4.** FT-IR spectra of Cu<sub>2</sub>O@PCN-223, PCN-223, and Cu<sub>2</sub>O.

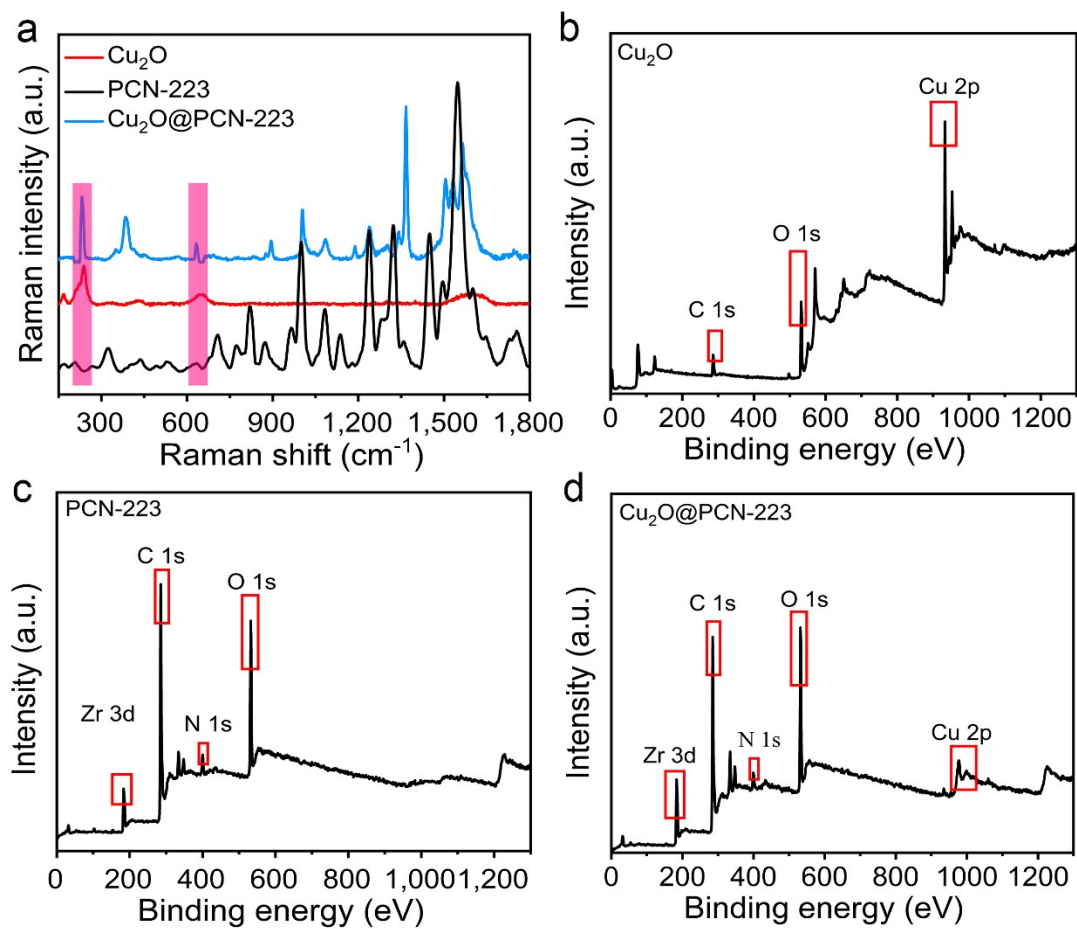

**Fig. S5.** Characterization of Cu<sub>2</sub>O@PCN-223, PCN-223, and Cu<sub>2</sub>O. (a) Raman spectra, (b) XPS spectrum of Cu<sub>2</sub>O; (c) XPS spectrum of PCN-223; (d) XPS spectrum of Cu<sub>2</sub>O@PCN-223.

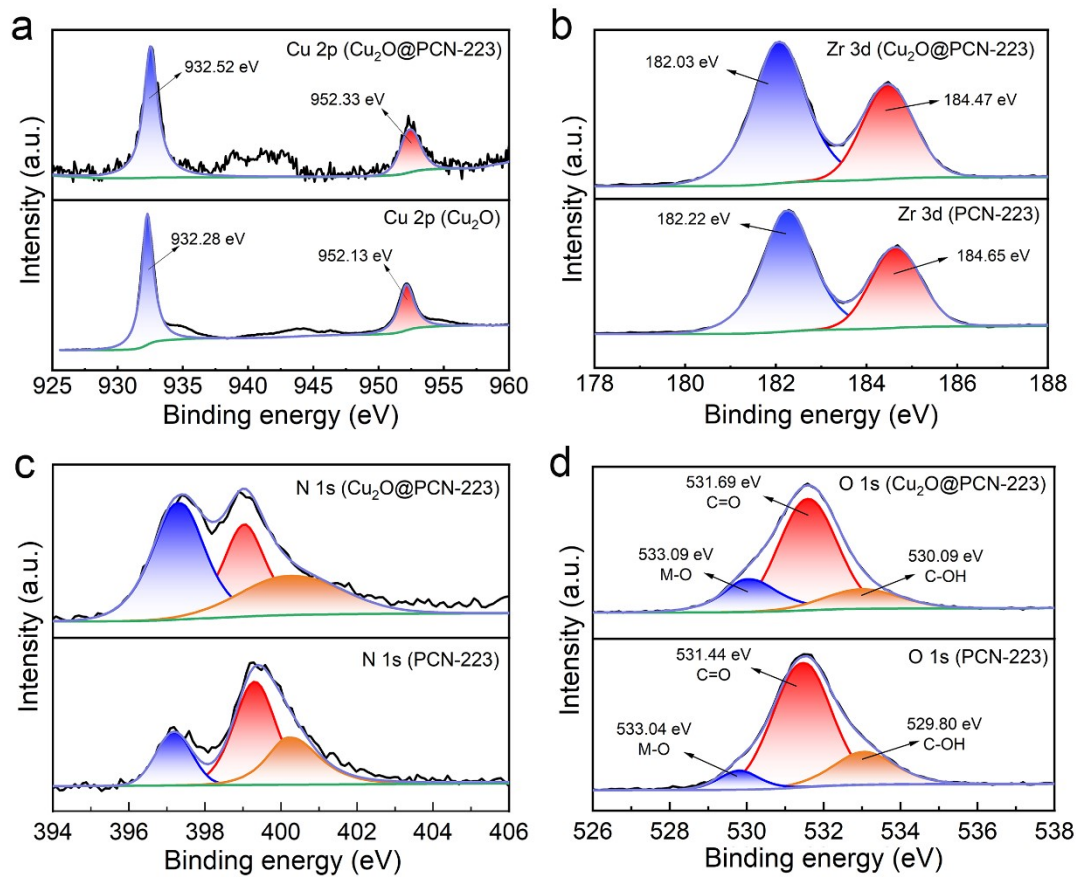

**Fig. S6.** High-resolution XPS spectra. (a) Cu 2p scan, (b) Zr 3d scan, (c) C 1s scan, (d) N 1s scan, and (e) O 1s scan.

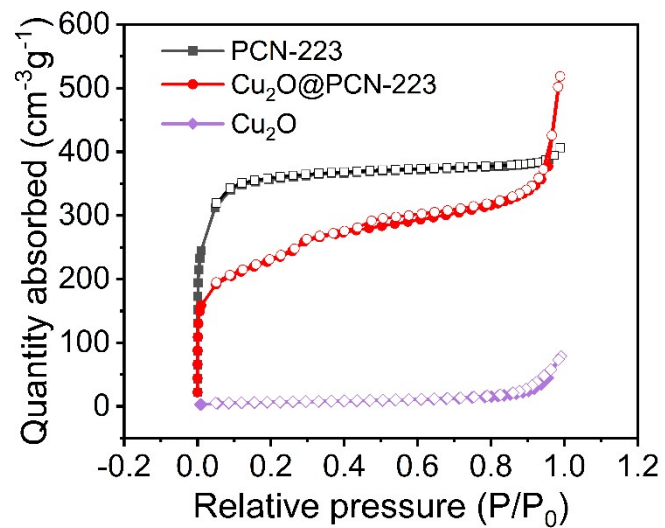

**Fig. S7.** N<sub>2</sub> adsorption-desorption isotherms of PCN-223, Cu<sub>2</sub>O and Cu<sub>2</sub>O@PCN-223.

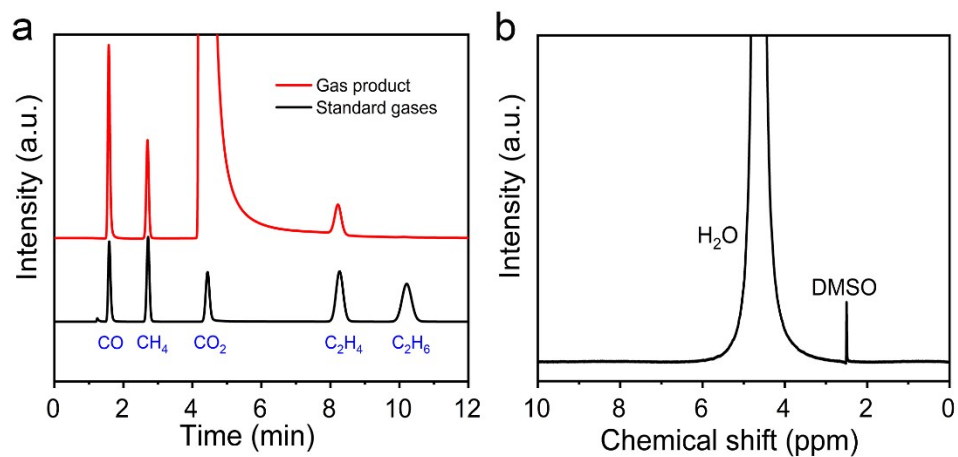

**Fig. S8.** Characterization of CO<sub>2</sub>RR products catalyzed by Cu<sub>2</sub>O@PCN-223. (a) Gas chromatogram, (b) <sup>1</sup>H NMR spectrum.

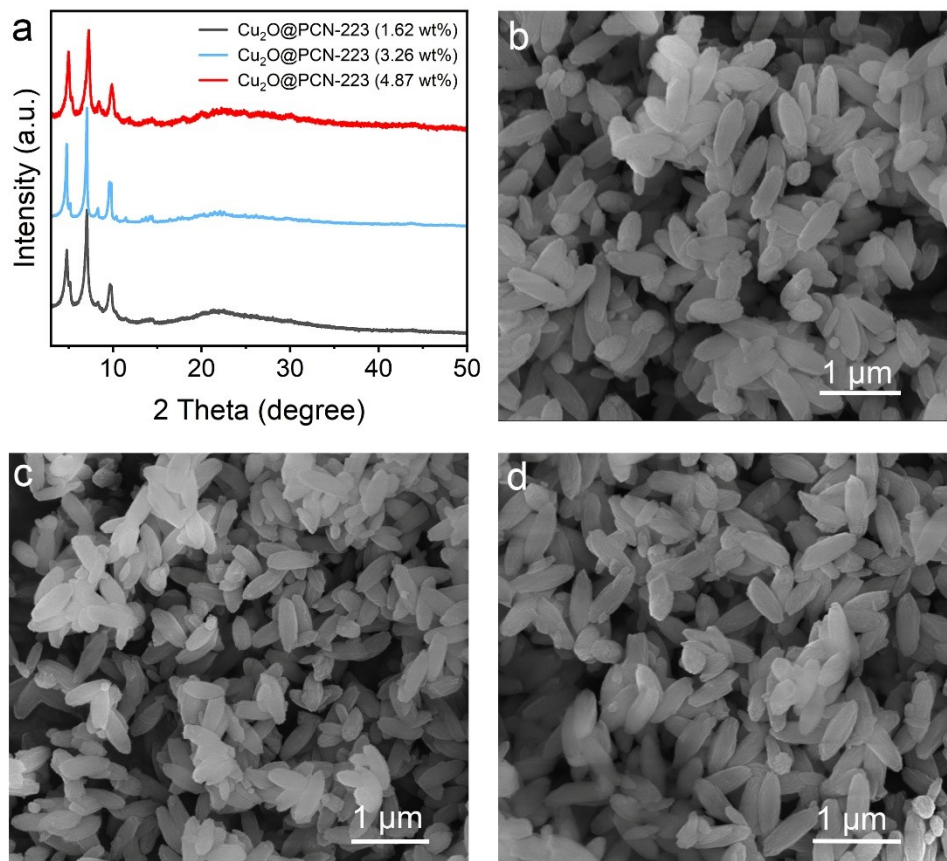

**Fig. S9.** Characterization of Cu<sub>2</sub>O@PCN-223 with different Cu<sub>2</sub>O loadings. (a) PXRD patterns. (b) SEM image of Cu<sub>2</sub>O@PCN-223 (1.62 wt%). (c) SEM image of Cu<sub>2</sub>O@PCN-223 (3.26 wt%). (d) SEM image of Cu<sub>2</sub>O@PCN-223 (4.87 wt%).

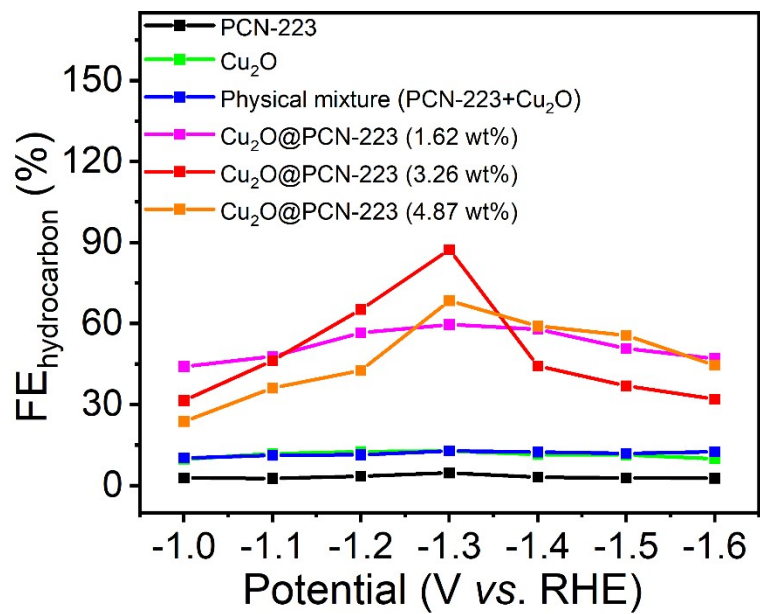

**Fig. S10.** Comparison of  $FE_{\text{hydrocarbons}}$  between  $\text{Cu}_2\text{O}@PCN-223$  and the reference sample.

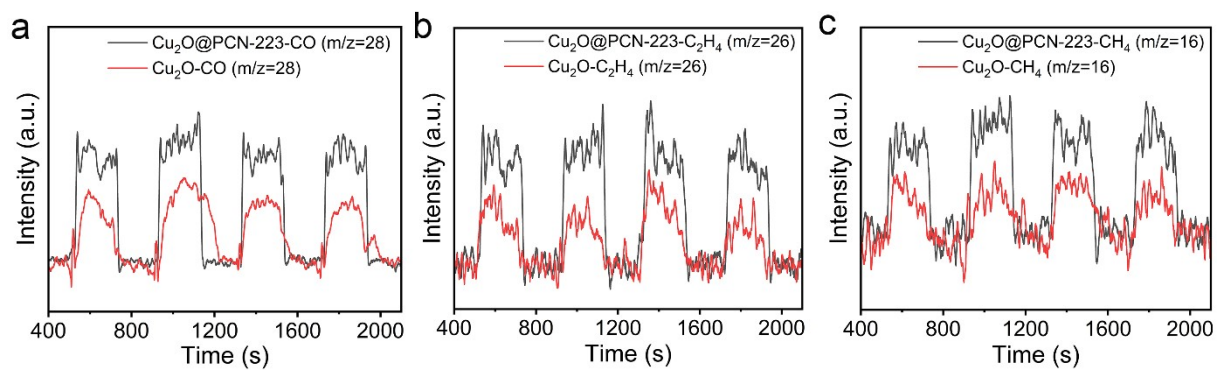

**Fig. S11.** Online differential electrochemical mass spectrometry (DEMS) of  $\text{Cu}_2\text{O}@$ PCN-223 at a constant potential of  $-1.3$  eV. (a) CO, (b)  $\text{CH}_2=\text{CH}_2$ , (c)  $\text{CH}_4$ .

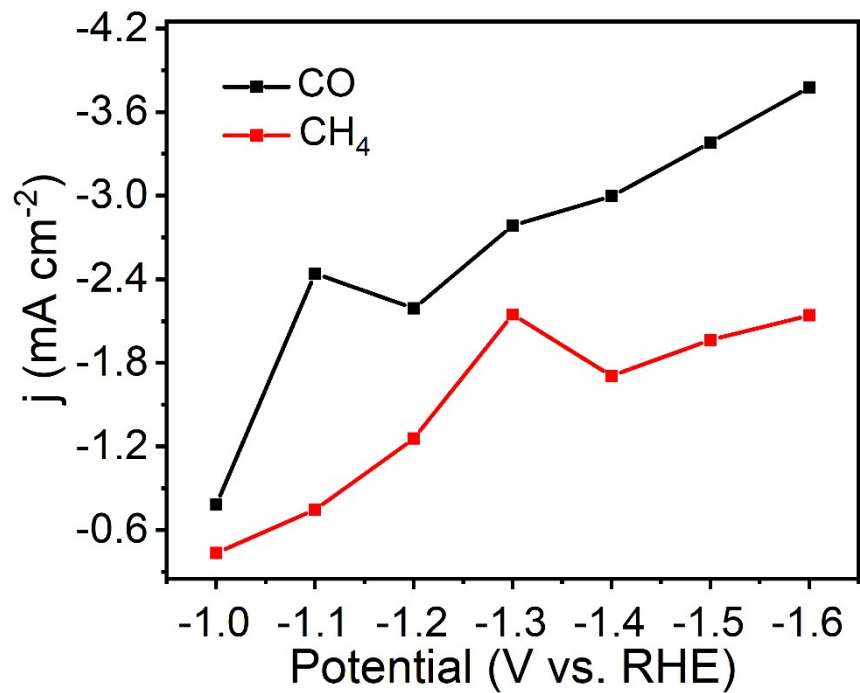

**Fig. S12.** Partial current densities of gaseous products obtained from PCN-223 at various applied potentials.

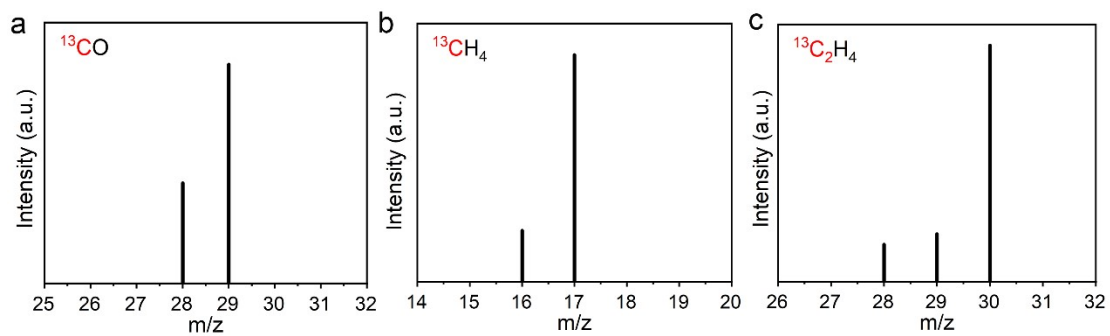

**Fig. S13.** Mass spectra for gas products. (a)  $^{13}\text{CO}$ ; (b)  $^{13}\text{CH}_4$ ; (c)  $^{13}\text{C}_2\text{H}_4$ .

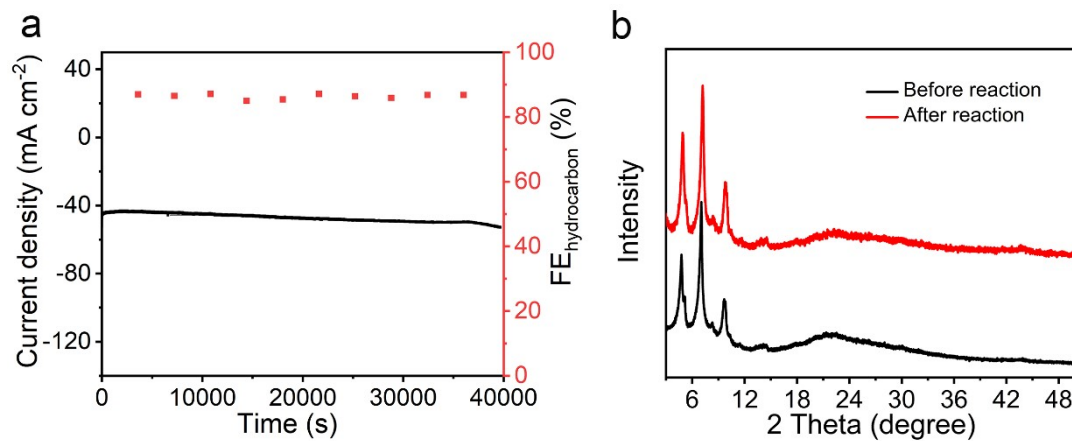

**Fig. S14.** Stability tests of Cu<sub>2</sub>O@PCN-223. (a) Durability test of Cu<sub>2</sub>O@PCN-223 at -1.3 V vs. RHE. b) PXRD patterns before and after reaction.

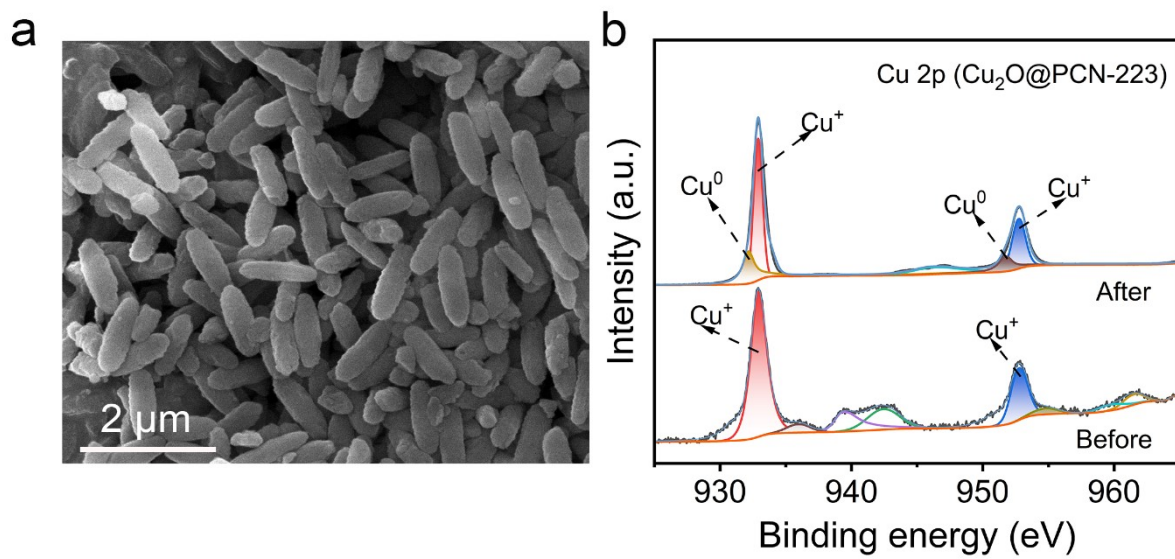

**Fig. S15.** (a) SEM image of Cu<sub>2</sub>O@PCN-223 after the reaction. (a) XPS spectra of Cu<sub>2</sub>O@PCN-223 before and after the reaction

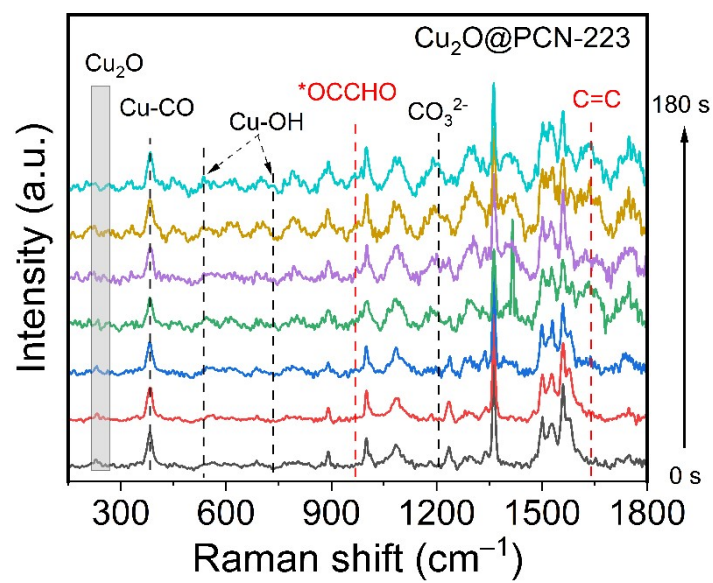

**Fig. S16.** In-situ Raman spectra of Cu<sub>2</sub>O@PCN-223 at different time points

**Table S1** BET surface area and pore volume of Cu<sub>2</sub>O@PCN-223 and PCN-223 calculated from N<sub>2</sub> adsorption data.

| Catalyst                  | Surface area<br>(m <sup>2</sup> /g) | Median pore width<br>(Å) | Pore volume<br>(cm <sup>3</sup> /g) |
|---------------------------|-------------------------------------|--------------------------|-------------------------------------|
| PCN-223                   | 1065.56                             | 5.871                    | 0.546                               |
| Cu <sub>2</sub> O         | 22.57                               | 11.247                   | 0.118                               |
| Cu <sub>2</sub> O@PCN-223 | 791.04                              | 5.822                    | 0.339                               |

**Table S2** Copper (Cu) content in Cu<sub>2</sub>O@PCN-223 with different cuprous oxide (Cu<sub>2</sub>O) loadings analyzed by inductively coupled plasma (ICP) testing.

| Samples                   | Cu (wt%) | Cu <sub>2</sub> O (wt%) |
|---------------------------|----------|-------------------------|
| Cu <sub>2</sub> O@PCN-223 | 1.44     | 1.62                    |
| Cu <sub>2</sub> O@PCN-223 | 2.90     | 3.26                    |
| Cu <sub>2</sub> O@PCN-223 | 4.33     | 4.87                    |

**Table S3** Comparison of Cu<sub>2</sub>O@PCN-223 with previously reported MOF electrocatalysts for CO<sub>2</sub>RR to produce ethylene and methane

| Catalyst                               | FE <sub>C<sub>2</sub>H<sub>4</sub></sub> | FE <sub>CH<sub>4</sub></sub> | FE <sub>CH</sub> | Potential | Stability | Ref       |
|----------------------------------------|------------------------------------------|------------------------------|------------------|-----------|-----------|-----------|
| Cu <sub>2</sub> O@PCN-223              | 48.7                                     | 38.6                         | 87.3             | -1.3 v    | 11 h      | This work |
| Au-NN@PCN-222(Cu)                      | 52.5                                     | 5.0                          | 57.5             | -1.2 v    | 10 h      | 6         |
| CPFs                                   | 18.0                                     | 56.0                         | 74.0             | -1.4 v    | 2 h       | 7         |
| Cu@ZIF-8                               | -                                        | -                            | 57.5             | -0.7 v    | 6.5 h     | 8         |
| Cu <sub>1</sub> Ni-BDP                 | 52.7                                     | -                            | ~52.7            | -1.3 v    | 28 h      | 9         |
| Lu-HHTP                                | -                                        | 77.0                         | 77.0             | -1.1 v    | 150 h     | 10        |
| Cu <sup>II</sup> /ade-MOF              | 45 (1.4)                                 | 50 (1.6)                     | 73.0             | -1.6 v    | 8 h       | 11        |
| S-HKUST-1                              | 60.0                                     | 5.6                          | 65.6             | -1.3 v    | 480 h     | 12        |
| Sn-THO                                 | -                                        | 46.5                         | 46.5             | -1.6 v    | 80 h      | 13        |
| 2Bn-Cu@Uio-67                          | -                                        | 81.0                         | ~81.0            | -1.5 v    | -         | 14        |
| NNU-50                                 | 15.1                                     | 66.4                         | 81.5             | -1.0 v    | 4 h       | 15        |
| KB@Cu <sub>3</sub> (HITP) <sub>2</sub> | 70.0                                     | -                            | ~70.0            | -1.4 v    | 10 h      | 16        |
| TEMPOL@HKUST-1                         | 44.7                                     | 11.5                         | 56.2             | -1.8 v    | 8.3 h     | 17        |
| Cu <sub>2</sub> O@Cu-MOF               | 16.2                                     | 63.2                         | 79.4             | -1.7 v    | 1 h       | 18        |
| BIC-145                                | 28.0                                     | 6.7                          | 34.7             | -1.2 v    | 5 h       | 19        |
| HATNA-Cu-MOF                           | -                                        | 78.0                         | ~78.0            | -1.5 v    | 12 h      | 20        |

## References:

- 1 X.L. Xie, X. Zhang, M. Xie, L.K. Xiong, H. Sun, Y.T. Lu, Q.Q. Mu, M.H. Rummeli, J.B. Xu, S. Li, J. Zhong, Z. Deng, B.G. Ma, T. Cheng, W.A. Goddard, Y. Peng, *Nat Commun*, 2022, **13**, 63.
- 2 G. Kresse, J. Furthmüller, *Phys. Rev. B*, 1996, **54**, 11169–11186.
- 3 G. Kresse, J. Furthmüller, *Comput. Mater. Sci*, 1996, **6**, 15–50.
- 4 P.E. Blöchl, *Phys. Rev. B*, 1994, **50**, 17953–17979.
- 5 J.P. Perdew, K. Burke, M. Ernzerhof, *Phys. Rev. Lett*, 1996, **77**, 3865–3868.
- 6 Xie, X., Zhang, X., Xie, M. et al. *Nat Commun*, 2022, **13**, 63
- 7 Y.Z. Zhou, S.H. Chen, S.B. Xi, Z.T. Wang, P.L. Deng, F. Yang, Y.J. Han, Y.J. Pang, B.Y. Xia, *Cell Rep Phys Sci*, 2020, **1**, 100182.
- 8 B. Sun, H. Hua, H.C. Liu, J.Y. Guan, K.X. Song, C.R. Shi, H.Y. Cheng, *J. Colloid Interface Sci*, 2024, **661**, 831 – 839.
- 9 L. Huang, Z.A. Liu, G. Gao, C.L. Chen, Y.R. Xue, J.W. Zhao, Q. Lei, M.T. Jin, C.Q. Zhu, Y. Han, J.S. Francisco, and X. Lu, *J. Am. Chem. Soc*, 2023, **145**, 26444-26451.
- 10 F.Q. Yu, G.Y. Zhang, M.X. Shu, H.M. Wang, *Angew. Chem. Int. Ed*, 2025, **64**, e202416467.
- 11 F. Yang, A.L. Chen, P.L. Deng, Y.Z. Zhou, Z. Shahid, H.F. Liu, B.Y. Xia, *Chem. Sci*, 2019, **10**, 7975.
- 12 C.F. Wen, M. Zhou, P.F. Liu, Y.W. Liu, X.F. Wu, F.X. Mao, S. Dai, B.B. Xu, X.L. Wang, Z. Jiang, P. Hu, S. Yang, H.F. Wang, H.G. Yang, *Angew. Chem. Int. Ed*, 2022, **61**, e202111700.
- 13 Z.H. Zhao, J.R. Huang, P.Q. Liao, X.M. Chen, *Angew. Chem. Int. Ed*, 2023, **62**, e202301767.
- 14 S.H. Chen, W.H. Li, W.J. Jiang, J.R. Yang, J.X. Zhu, L.G. Wang, H.H. Ou, Z.C Zhuang, M.Z. Chen, X.H. Sun, D.S. Wang, Y.D. Li, *Angew. Chem. Int. Ed*, 2022, **61**, e202114450.

- 15 L.Z. Dong, Y.F. Lu, R. Wang, J. Zhou, Y. Zhang, L. Zhang, J. Liu, S.L. Li, Y.Q. Lan, *Nano Res*, 2022, **15**, 10185–10193.
- 16 H. Sun, L. Chen, L.K. Xiong, K. Feng, Y.F. Chen, X. Zhang, X.Z. Yuan, B.Y. Yang, Z. Deng, Y. Li, M.H. Rümmele, J. Zhong, Y. Jiao, Y. Peng, *Nat Commun*, 2021, **12**, 6823.
- 17 B.P. Yin, C. Wang, S.J. Xie, J.M. Gu, H. Sheng, D.X. Wang, J.N. Yao, C. Zhang, *Angew. Chem. Int. Ed*, 2024, **63**, e202405873.
- 18 X.Y. Tan, C. Yu, C.T. Zhao, H.W. Huang, X.C. Yao, X.T. Han, W. Guo, S. Cui, H.L. Huang, J.H. Qiu, *ACS Appl. Mater. Interfaces*, 2019, **11**, 9904-9910.
- 19 J.Q. Chen, Q.H. Li, Q.L. Hong, P. Shao, H.X. Zhang, J. Zhang, *Sci. China Chem*, 2025, **68**, 943–950.
- 20 Y.Z. Liu, S. Li, L. Dai, J.N. Li, J.N. Lv, Z.J.J. Zhu, A.X. Yin, P.F. Li, B. Wang, *Angew. Chem. Int. Ed*, 2021, **60**, 16409 – 16415.
